# Supplementary material for: Inducing Mitotic Catastrophe as a Therapeutic Approach to Improve Outcomes in Ewing Sarcoma
Source: Preprints.org preprint supplement (doi:10.20944/preprints202309.2164.v1), 2023-09-30

# Supplementary Figure 1

A)

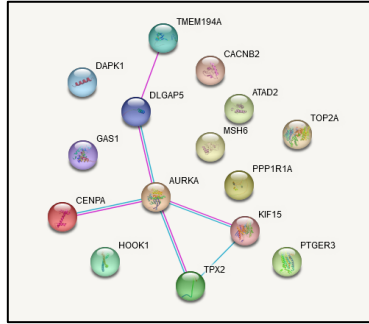

B)

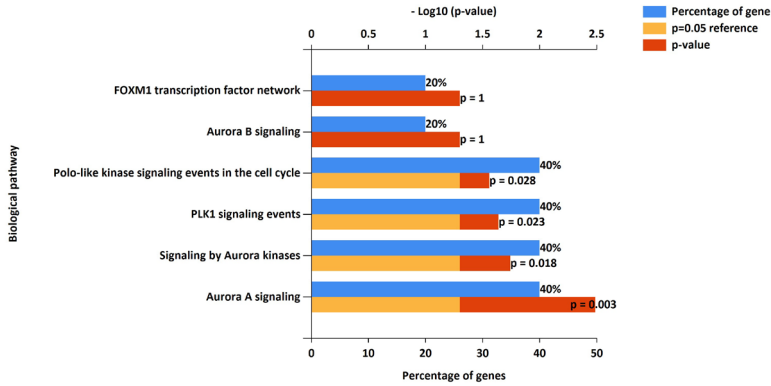

C)

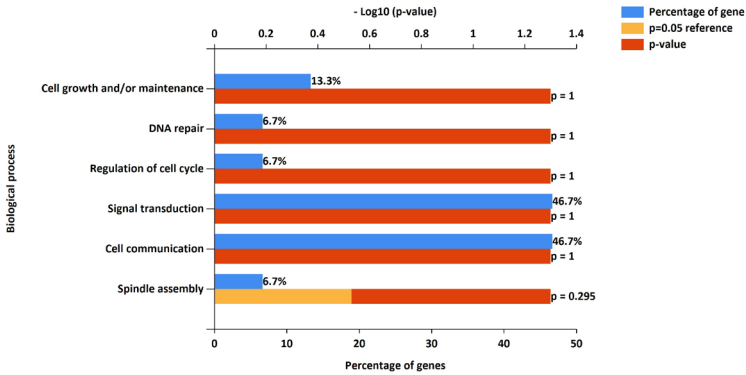

D)

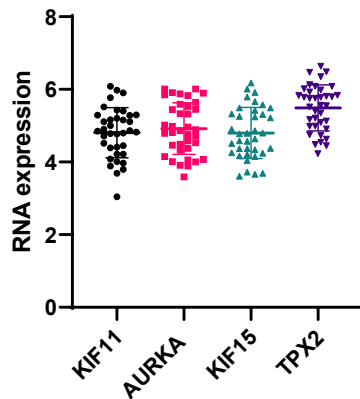

Supplementary Figure 2 (related to main Figure 1)

Wes blots quantification

A)

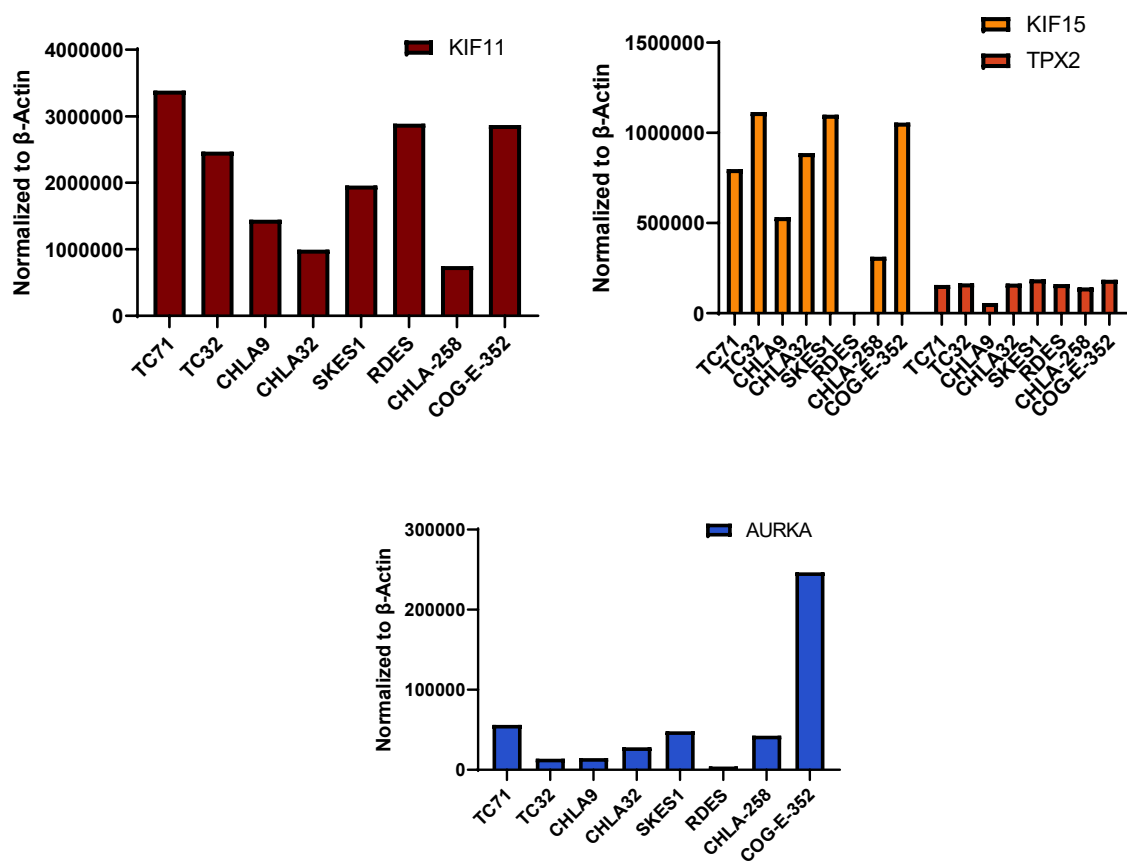

# Supplementary Figure 3 CHLA-9 (EWS-FLI1 Type I fusion)

A)

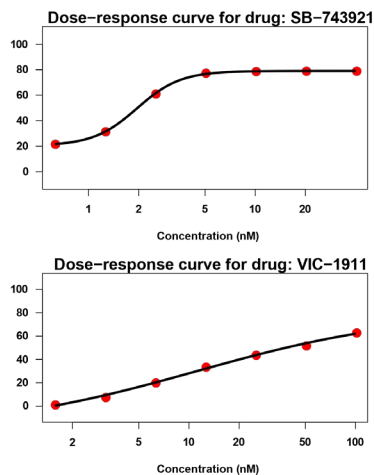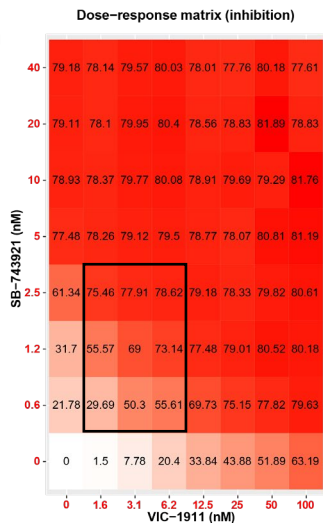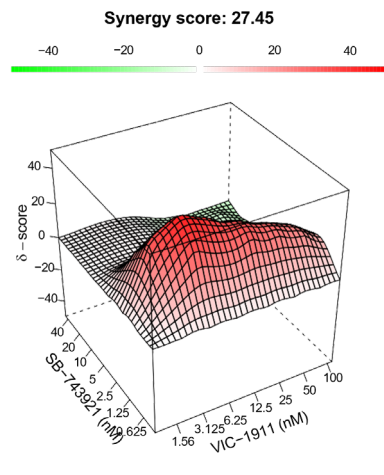

## CHLA-32 (EWS-FLI1 Type I fusion)

B)

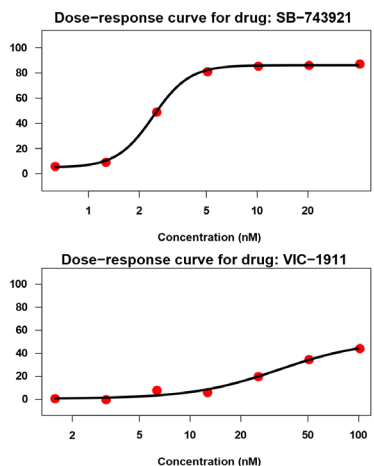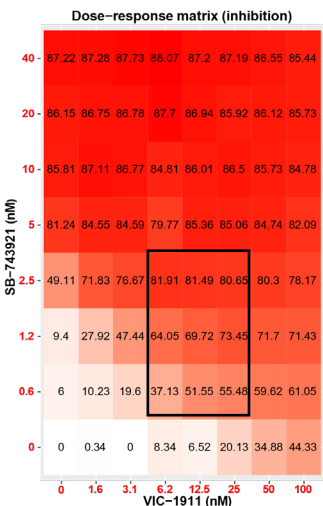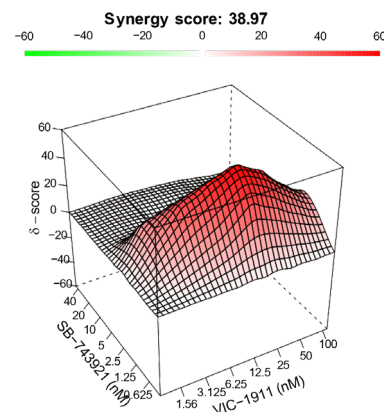

C)

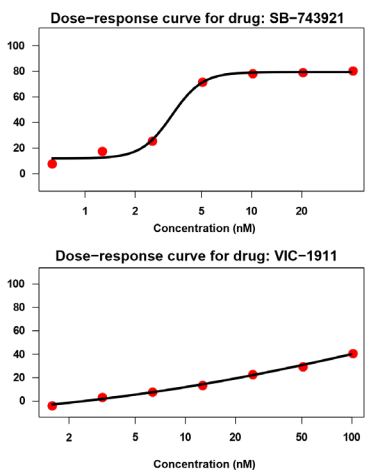

## TC-32 (EWS-FLI1 Type I fusion)

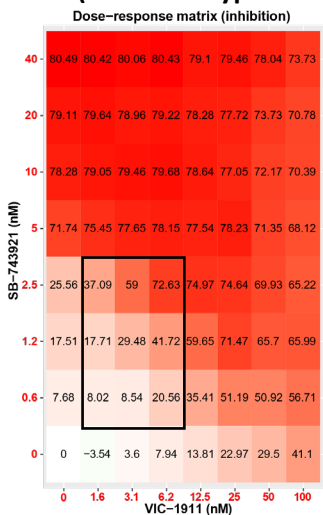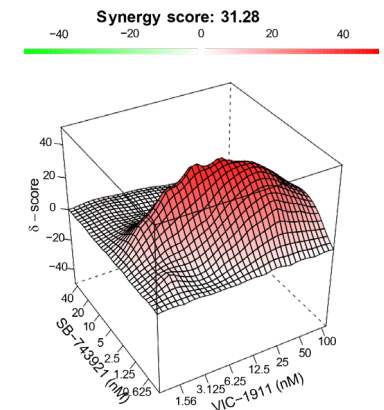

# Supplementary Figure 4 U2-OS (Osteosarcoma)

A)

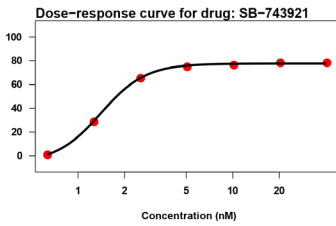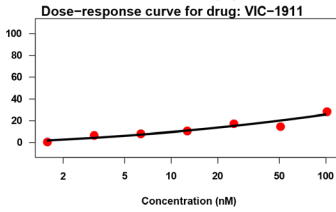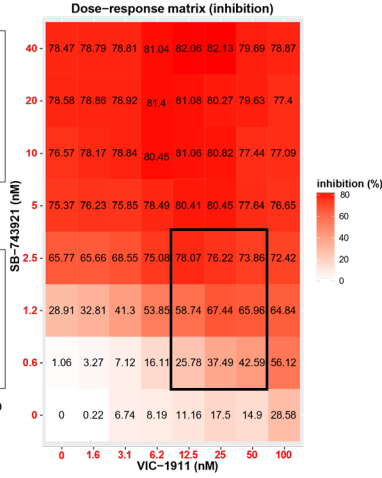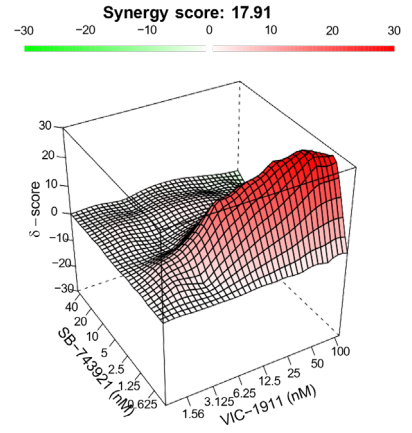

B)

## RMS-13 (Rhabdomyosarcoma)

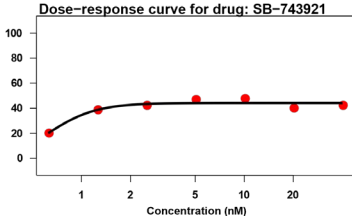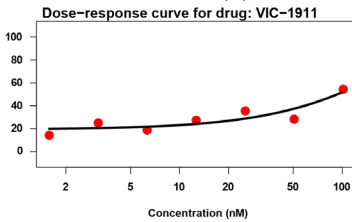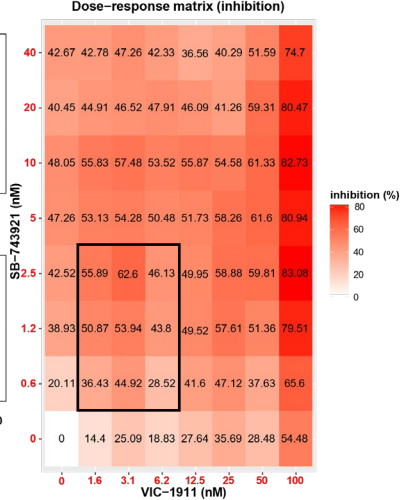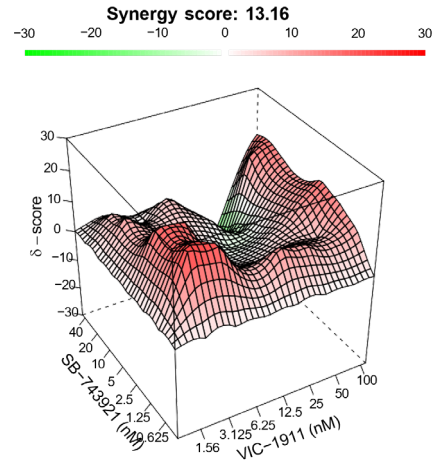

C)

## Mesenchymal stem cells (control)

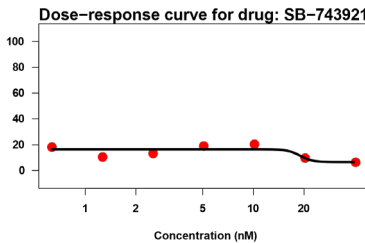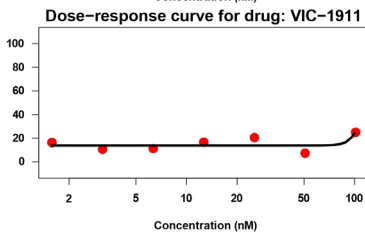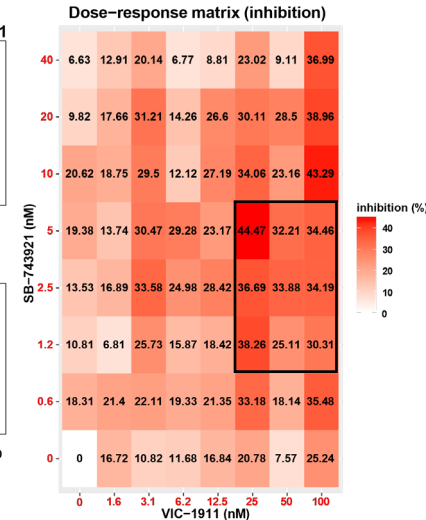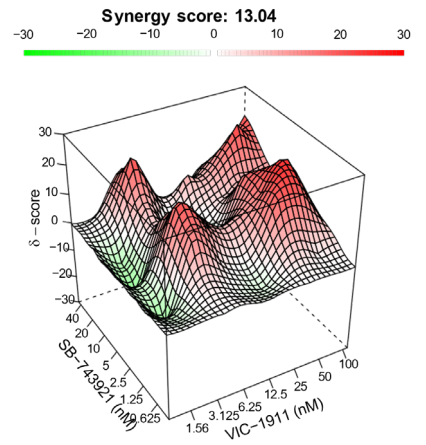

# Supplementary Figure 5 (related to main figure 6)

## CHLA-10- Wes blots quantification

A)

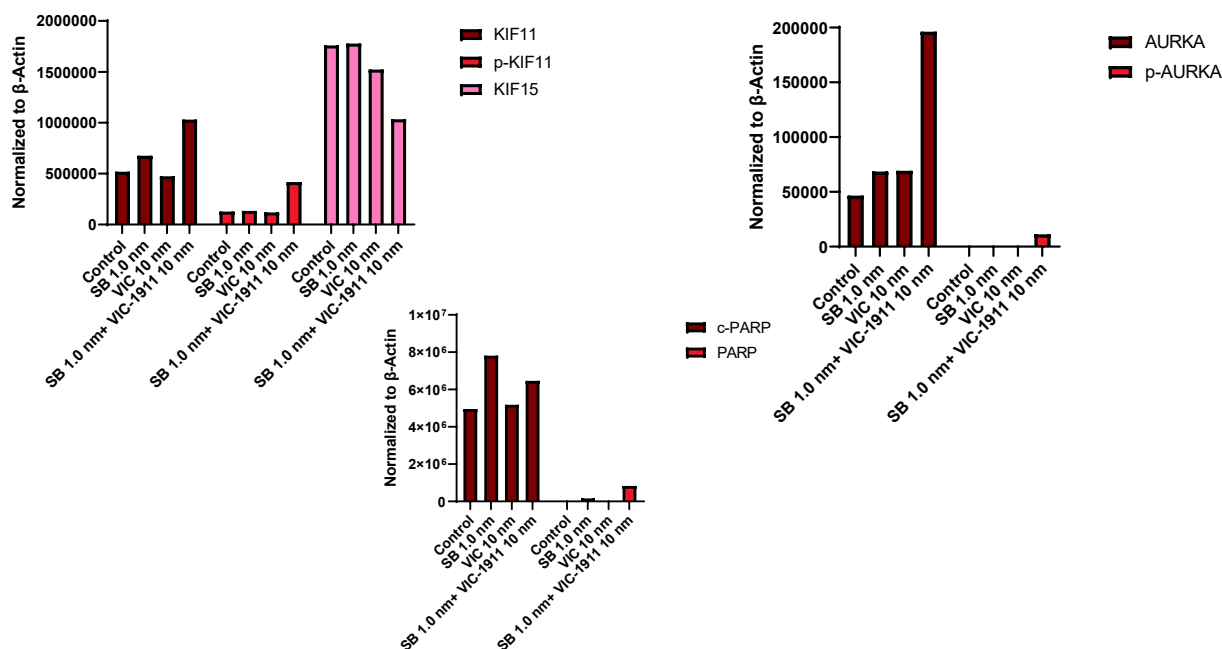

B)

## TC-71- Wes blots quantification

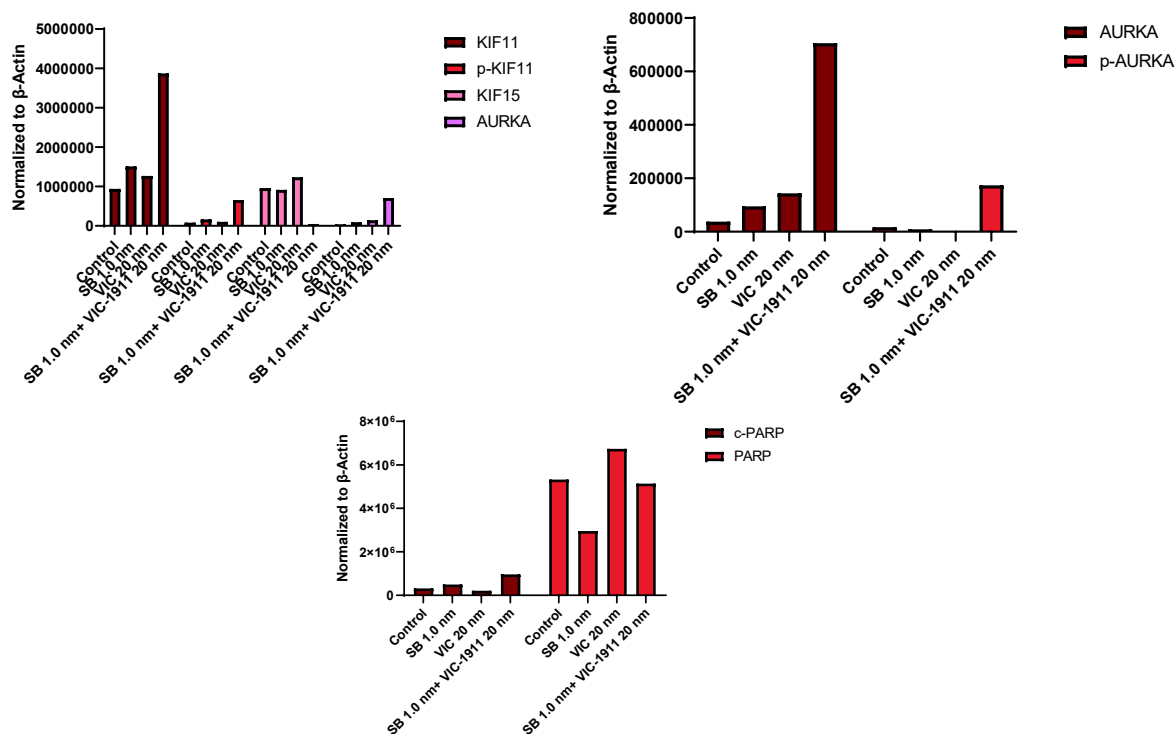

# Supplementary Figure 6

A)

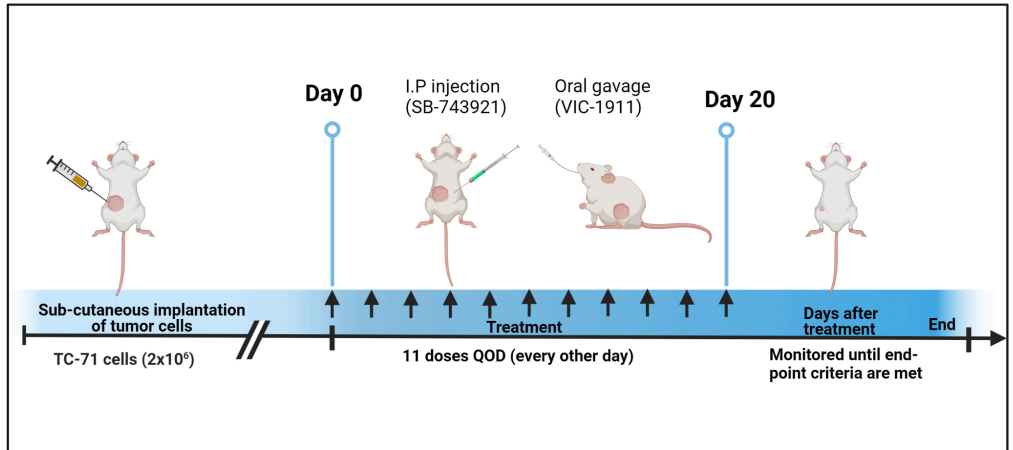

B)

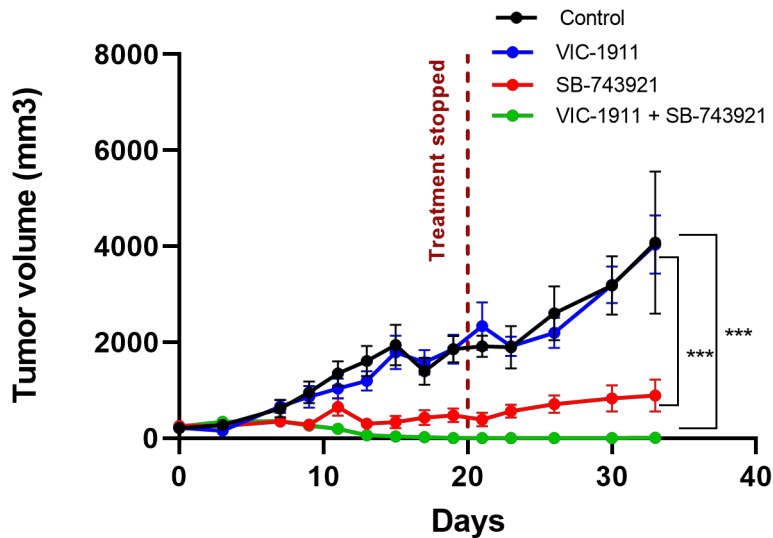

C)

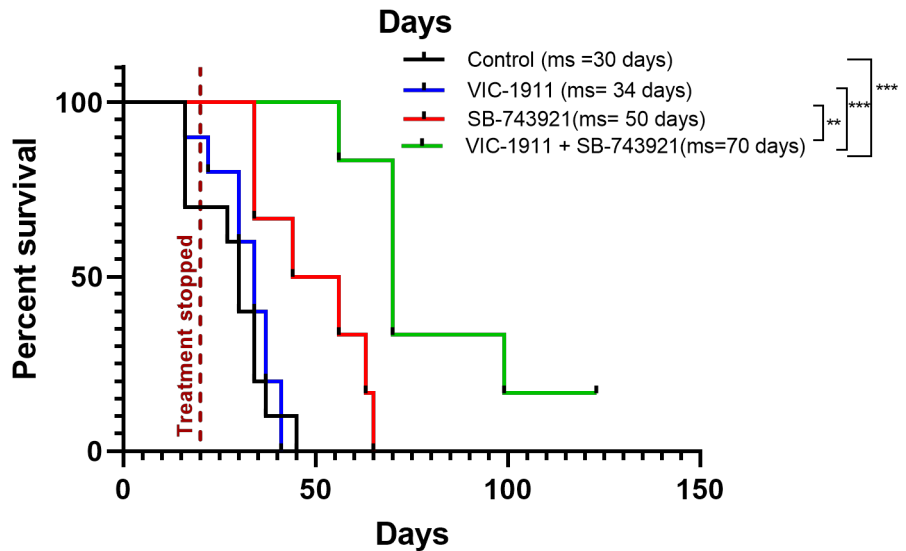

# Supplementary Figure 7

## Study 1

A)

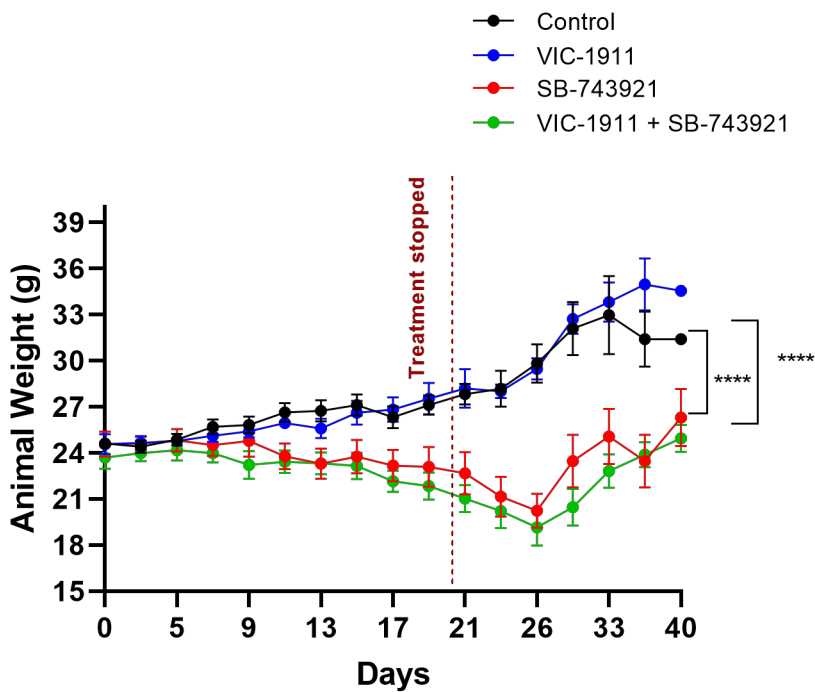

## Study 2

B)

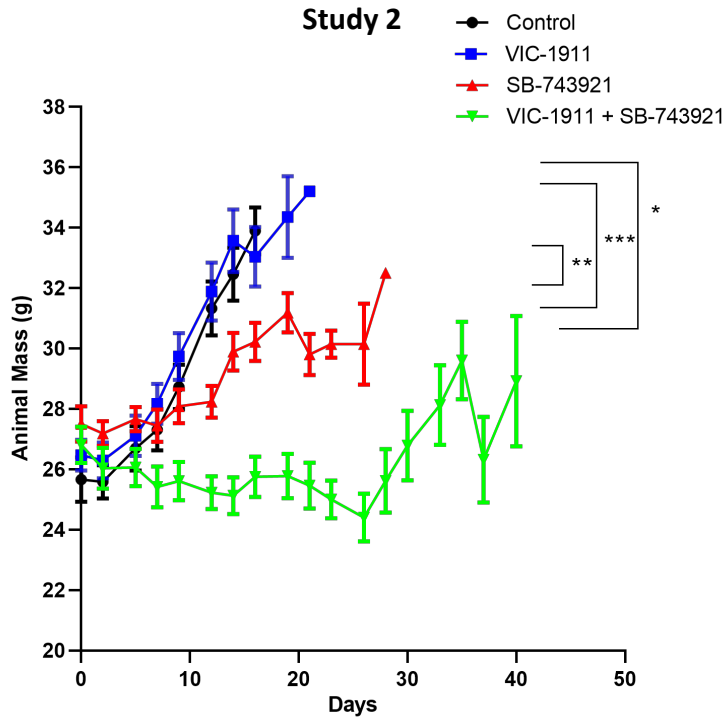

Supplement: Supplementary file 1 [file supplementary]
