# Supplementary material for: Inducing Mitotic Catastrophe as a Therapeutic Approach to Improve Outcomes in Ewing Sarcoma
Source: Preprints.org preprint supplement (doi:10.20944/preprints202309.2164.v1), 2023-09-30
Supplement: Supplementary file 3 [file supplementary]

Archive with 2 entries (2 files):
- Supplementary Figure Legends Final.pdf
- Supplementary Figures Final.pdf
